# Supplementary material
Source: PubMed Central journal article supplement (PMC5261552)
Supplement: NIHMS840520-supplement-extended_data.pdf [file NIHMS840520-supplement-extended_data.pdf]

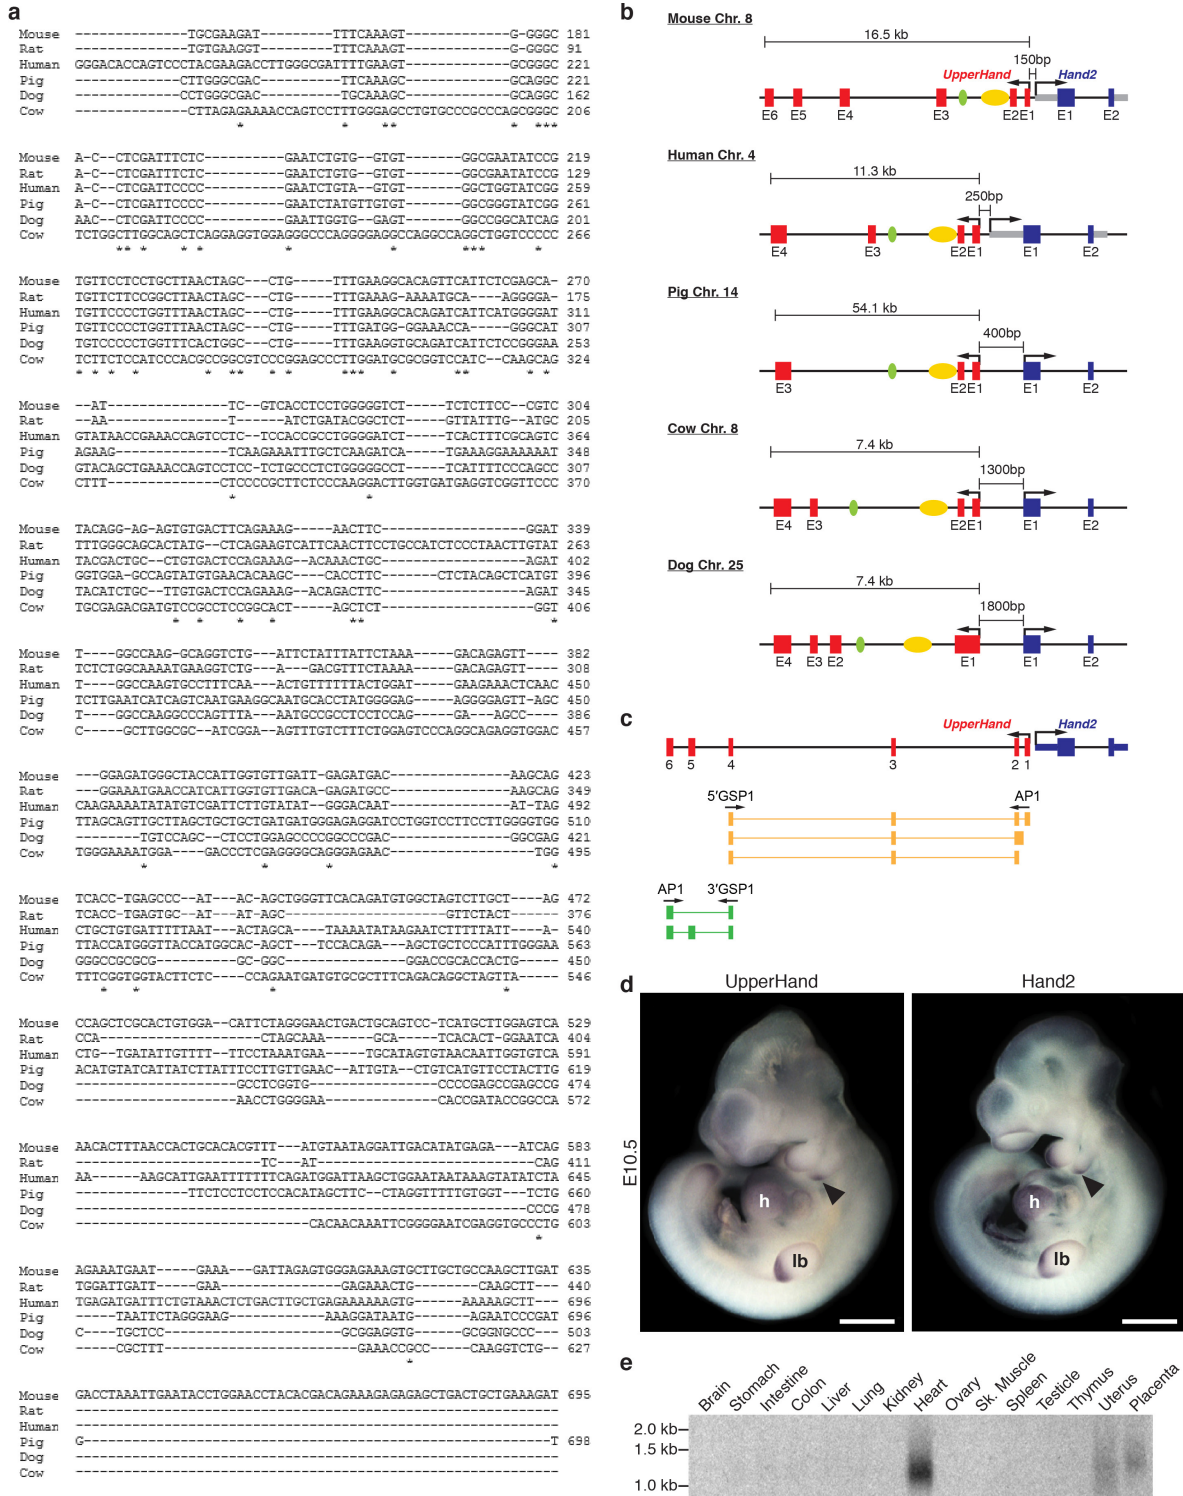

**Extended Data Figure 1 | Sequence alignment of several mammalian *Uph* transcripts.** **a**, Sequence alignment of several mammalian *Uph* transcripts performed using ClustalW. See Methods for source data. **b**, Diagram of the *Hand2* locus in mammals showing the genomic organization and orientation of *Uph*. The *Hand2* branchial arch enhancer (green) and cardiac enhancer (yellow) are shown. **c**, Diagram of the *Uph* transcripts expressed in the mouse heart, determined using 5' and

3' RACE using primers specific to exon 4 of *Uph*. AP1, marthon adaptor primer; 3'GSP, 3' *Uph*-specific primer from exon 4; 5'GSP, 5' *Uph*-specific primer from exon 4. **d**, Whole mount *in situ* hybridization of E10.5 mouse embryos. Expression was detected in heart, branchial arches (arrowhead), and limb bud. Scale bars, 1 mm. **e**, Northern blot analysis of total RNA from adult mouse tissues using a probe specific to the major *Uph* transcript. For gel source data, see Supplementary Fig. 1.

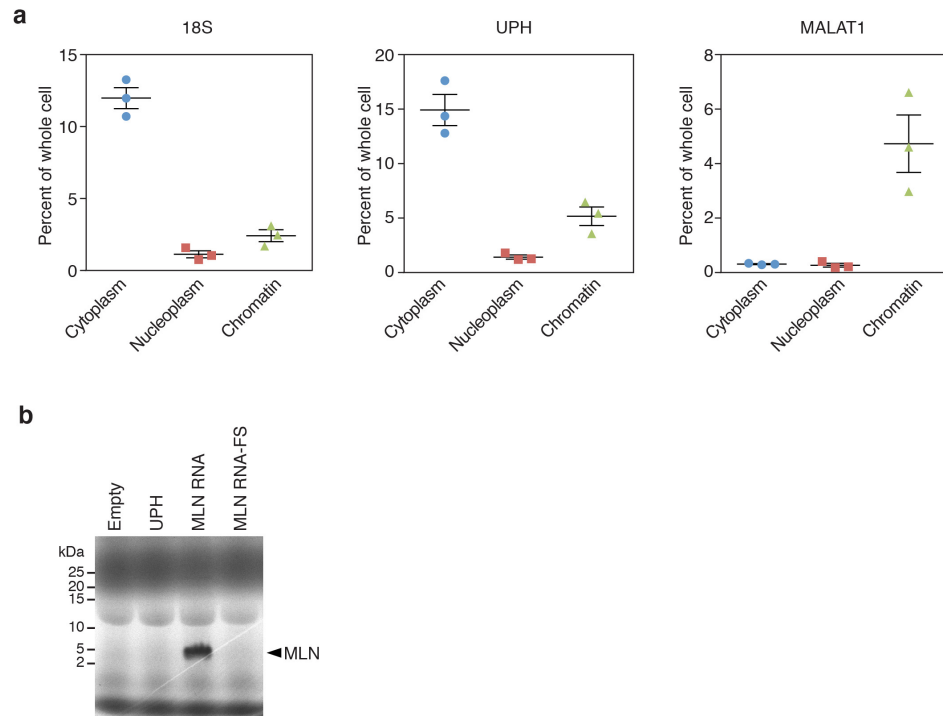

**Extended Data Figure 2 | *Uph* is a cytoplasmic lncRNA.** **a**, Subcellular fractionation of 18S, *Uph* and *Malat1* lncRNA in mouse neonatal cardiomyocytes ( $n = 3$  biological replicates from 1 of 5 independent experiments; mean  $\pm$  s.e.m.). **b**, *In vitro* transcription and translation of a plasmid encoding the major *Uph* RNA. A plasmid encoding the

myoregulin (MLN) micropeptide was used as a positive control, and myoregulin with a frameshift mutation (MLN RNA-FS) was used as a negative control. In contrast to myoregulin, *Uph* and the negative control (MLN RNA-FS) did not produce any detectable proteins, indicating that *Uph* is a bona fide lncRNA. For gel source data, see Supplementary Fig. 1.

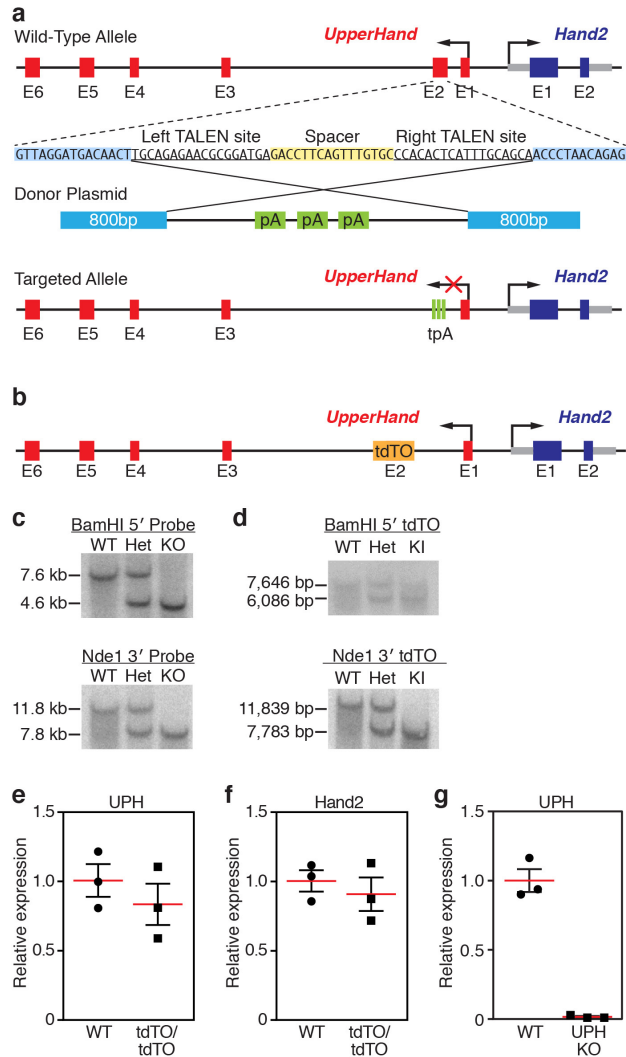

**Extended Data Figure 3 | Targeting strategy for insertion of transcriptional termination or heterologous sequence into exon 2 of *Uph*.** **a**, *Uph* KO targeting strategy. Transcription activator-like effector nucleases (TALENs) were used to insert a triple polyadenylation (tpA) termination sequence into exon 2 (E2) of *Uph*. **b**, Using the same TALEN pair as in **a**, we introduced the coding sequence of tdTO, lacking a polyadenylation sequence, into exon 2 of the *Uph* locus. Exon 2, which includes the tdTO coding sequence, was spliced out of the mature *Uph* transcript, preventing expression of tdTO in these mice. **c**, Southern blot analysis of wild-type, heterozygous *Uph*<sup>+/-</sup> (Het) and *Uph* KO genomic DNA. BamHI-digested DNA hybridized with a 5'-specific probe and NdeI-digested DNA hybridized with a 3'-specific probe. For gel source data, see Supplementary Fig. 1. **d**, Southern blot analysis of wild-type, *Uph*<sup>tdTO/+</sup> heterozygous and *Uph*<sup>tdTO/tdTO</sup> knock-in (KI) genomic DNA verified the correct targeting of the tdTO sequence into the *Uph* locus. DNA was digested with BamHI and hybridized with a 5'-specific probe or digested with NdeI and hybridized with a 3'-specific probe. For gel source data, see Supplementary Fig. 1. **e**, **f**, Expression of *Uph* (**e**) and *Hand2* (**f**) in wild-type and *Uph*<sup>tdTO/tdTO</sup> homozygous mice at E10.0 was not changed by the insertion of the tdTO sequence into exon 2 of the *Uph* locus ( $n = 3$ , representative of 3 independent experiments; mean  $\pm$  s.e.m.). **g**, qPCR shows *Uph* transcripts decreased by  $\sim 97\%$  in E10.5 hearts ( $n = 3$  mice of each genotype from 1 of 3 independent experiments; mean  $\pm$  s.e.m.).

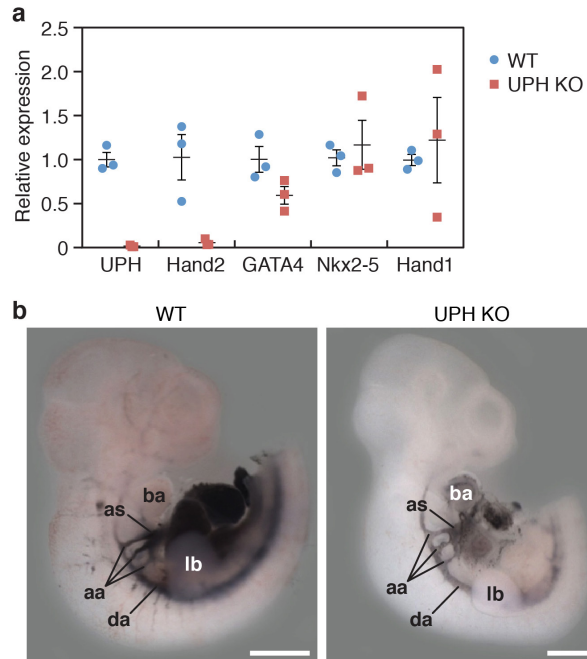

**Extended Data Figure 4 | Aortic arch arteries are normal in *Uph* KO embryos.** **a**, qPCR quantification of gene expression at E10.0 showed robust downregulation of *Uph* and *Hand2* expression in *Uph* KO hearts, with normal expression of other cardiac transcription factors ( $n = 3$  mice of each genotype from 1 of 3 independent experiments; mean  $\pm$  s.e.m.). **b**, India ink was injected into either the left ventricle of wild-type embryos or the single ventricle of *Uph* KO embryos at E10.5, to visualize the aortic arch arteries and circulation, which appeared normal in *Uph* KO embryos. aa, aortic arch arteries; as, aortic sac; da, dorsal aorta. Scale bars, 1 mm.

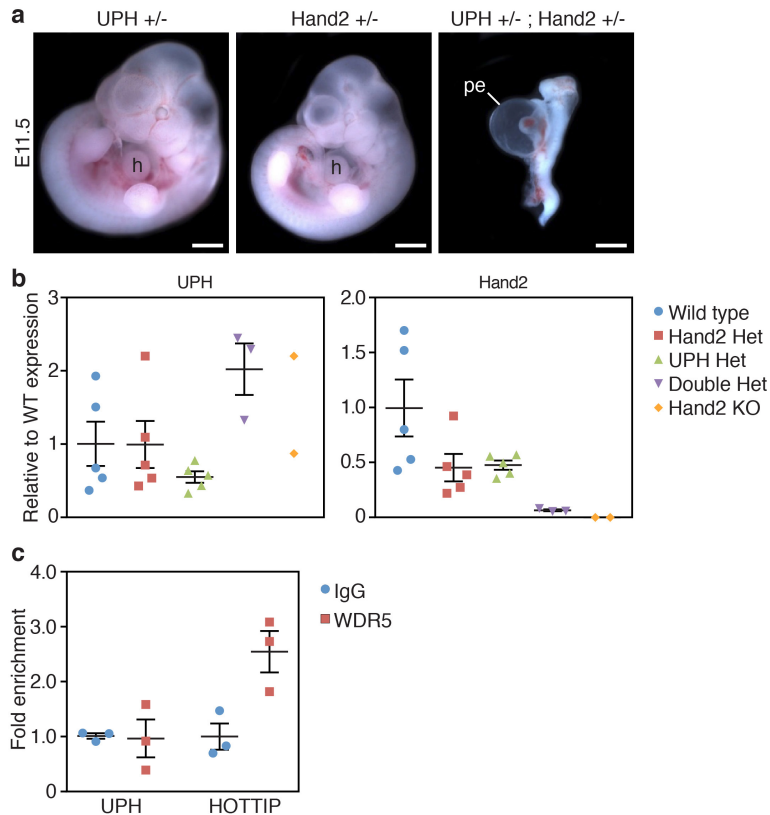

**Extended Data Figure 5 | *Uph*<sup>+/-</sup> *Hand2*<sup>+/-</sup> compound heterozygotes recapitulate *Uph* KO phenotype.** **a**, *Uph*<sup>+/-</sup> *Hand2*<sup>+/-</sup> double heterozygote embryos developed a single ventricle, pericardial effusion, and were severely growth restricted by E11.5. Scale bars, 1 mm. **b**, *Uph* expression is normal in double heterozygotes, whereas *Hand2* was reduced by ~90%, relative to wild-type embryos ( $n = 5$  mice for wild type, *Hand2*

het and *Uph* het,  $n = 3$  for double het,  $n = 2$  for *Hand2* KO, from 1 of 2 independent experiments; mean  $\pm$  s.e.m.). **c**, Immunoprecipitation of RNA using either IgG or WDR5 in HL-1 cells followed by qPCR for *Uph* revealed no binding to WDR5. The WDR5-interacting lncRNA HOTTIP was used as a positive control ( $n = 3$  biological replicates from 1 of 3 independent experiments; mean  $\pm$  s.e.m.).

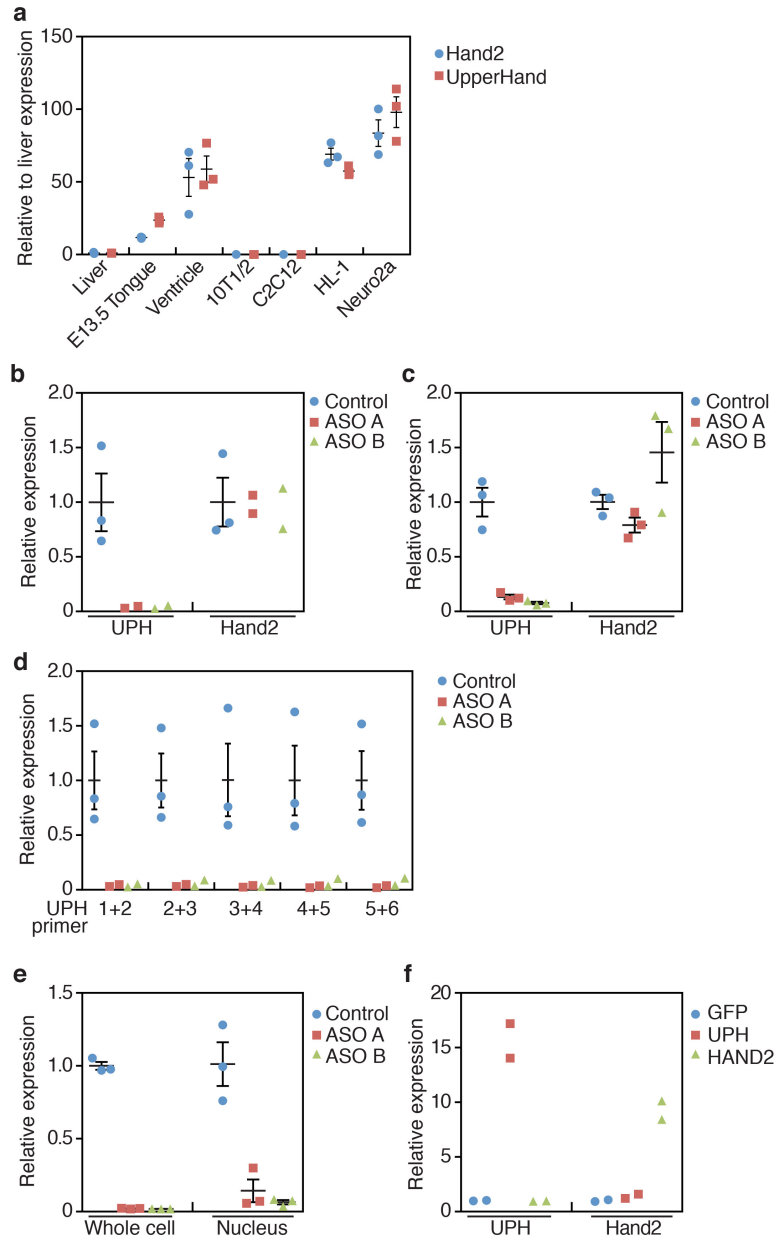

**Extended Data Figure 6 | Knockdown of mature *Uph* transcripts in HL-1 or Neuro2a cells does not affect *Hand2* expression.** **a**, Expression of *Uph* (red) and *Hand2* (blue) in various tissues and cell lines. *Uph* and *Hand2* are robustly expressed in the heart, and the HL-1 and Neuro2a cell lines. *Uph* and *Hand2* transcripts are not expressed in the liver, 10T1/2 fibroblasts or skeletal muscle C2C12 myotubes ( $n = 3$  technical replicates; mean  $\pm$  s.e.m.). **b, c**, *Uph* transcripts were reduced by  $\sim 90\%$  in HL-1 (**b**) and Neuro2a (**c**) cells when transfected with two independent GapmeR antisense oligonucleotide probes (ASO A and B) against *Uph*. Expression of *Hand2* was not changed ( $n = 2$  for ASO A and B,  $n = 3$  for control, from 1 of 2 independent experiments; mean  $\pm$  s.e.m.). **d**, *Uph* transcripts were similarly downregulated across each exon-exon junction, measured using

qPCR ( $n = 2$  for ASO A and B,  $n = 3$  for control, from 1 of 2 independent experiments; mean  $\pm$  s.e.m.). **e**, Fractionation of HL-1 cells transfected with control or *Uph*-specific ASOs. The nuclear fraction of antisense-oligonucleotide-treated HL-1 cells showed a similar downregulation of *Uph* transcripts ( $n = 3$  biological replicates from 1 of 3 independent experiments; mean  $\pm$  s.e.m.). **f**, Overexpression of enhanced green fluorescent protein (eGFP; blue), the major *Uph* RNA (red) or *Hand2* RNA (green) in HL-1 cells revealed that the mature *Uph* transcript did not alter *Hand2* expression relative to wild type, and that *Hand2* does not influence the expression of *Uph* in these cells ( $n = 2$  biological replicates from 1 of 2 independent experiments; mean  $\pm$  s.e.m.).

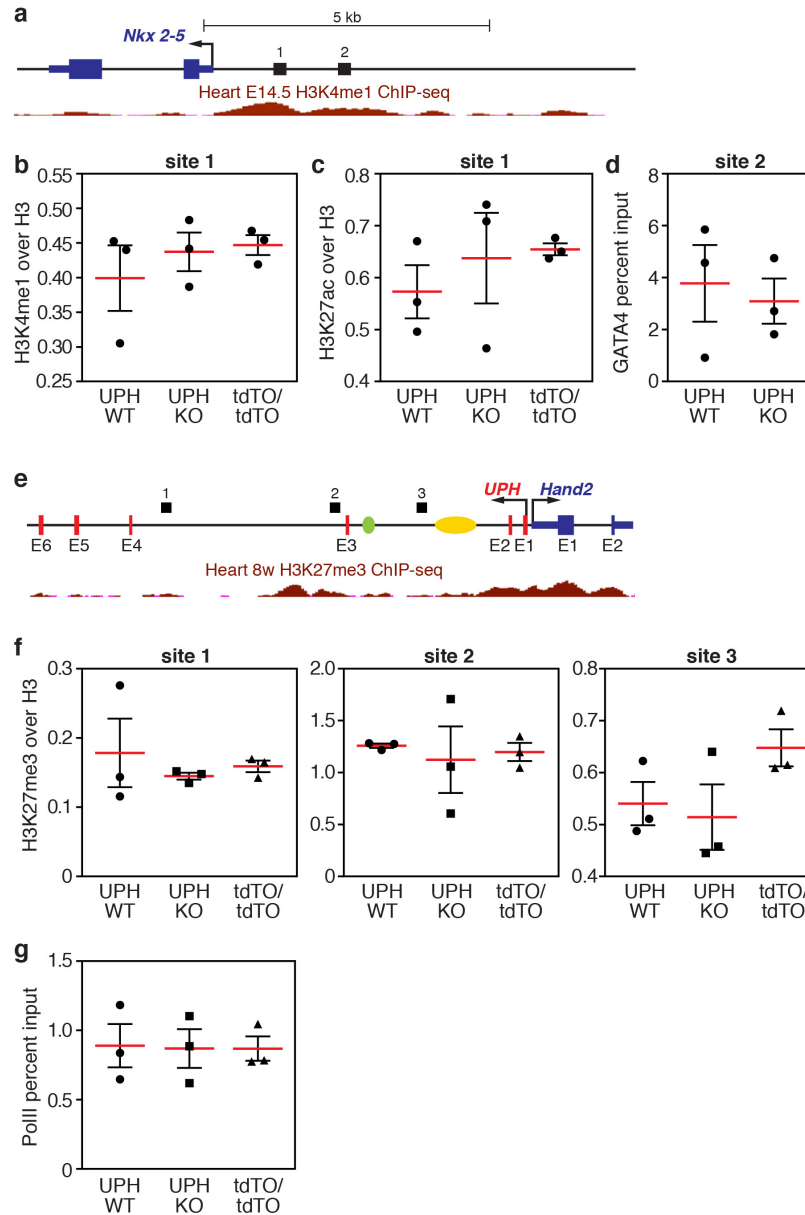

**Extended Data Figure 7 | ChIP and qPCR analyses of active cardiac enhancers regulating *Nkx2-5* expression.** **a**, Diagram of the *Nkx2-5* locus with numbers (1 and 2) indicating the region analysed by qPCR following ChIP. Shown in red are the ENCODE/LICR H3K4me1 active enhancer marks in the heart at E14.5. See Methods for source data. **b**, ChIP coupled with qPCR analysis of H3K4me1 marks, normalized to total histone H3, showed that the H3K4me1 marks bound to the *Nkx2-5* promoter region are unchanged between wild-type, *Uph* KO and *Uph*<sup>tdTO/tdTO</sup> homozygous hearts at E10.0. **c**, ChIP coupled with qPCR analysis of H3K27ac marks, normalized to total histone H3, showed that the H3K27ac marks bound to the *Nkx2-5* promoter region are unchanged between wild-type, *Uph* KO and *Uph*<sup>tdTO/tdTO</sup> homozygous hearts at E10.0. **d**, GATA4 binding to a

GATA4 site in the *Nkx2-5* promoter is unchanged between wild-type and *Uph* KO hearts at E10.0. **e**, Diagram of the *Uph-Hand2* locus, with black bars indicating the regions analysed by qPCR following ChIP. Shown in red is the ENCODE/LICR H3K27me3 track for mouse heart. See Methods for source data. The branchial arch enhancer (green) and cardiac enhancer (yellow) are shown. **f**, ChIP coupled with qPCR analysis of the polycomb repressive marker H3K27me3, normalized to total histone H3, showed no differences between genotypes at each locus (1–3) indicated in the diagram in **e**. **g**, qPCR revealed no difference in the levels of Ser2-phosphorylated RNAPII between genotypes at the *Nkx2-5* gene body. Each point is one of 3 technical replicates of 5 pooled hearts for each genotype in each ChIP experiment, from 1 of 2 independent experiments; mean  $\pm$  s.e.m.

Extended Data Table 1 | Relevant sequences

| SEQUENCE NAME            | FORWARD                                  | REVERSE                                       |
|--------------------------|------------------------------------------|-----------------------------------------------|
| Full Length UPH sequence | CACTCATAACCATAAGATAATTTAAAACGG           | TTTAAAAAATAATTTTAAATATACTATGTGCATGGTTGGATAGGT |
| UPH qPCR primers         | CATTCTCGAGCAATTGCTCA                     | TGGTAGCCCATCTCCAACCT                          |
| UPH ISH probe            | GATGAGACCTTCAGTTTGTGCC                   | ATACTATGTGCATGGTTGGATAGGT                     |
| Hand2 ISH probe          | ATGAGTCTGGTGGGGGGC                       | TCACTGCTTGAGCTCCAGG                           |
| UPH targeting 5' arm     | TATCGGAGCTCGCACCTCGGAGCTGGGAA            | GATACGCGGCCGCGGATCCAGTTGTCATCCTAACTTGGGTCA    |
| UPH targeting 3' arm     | TATCGGCTAGCCATATGACCCCTAACAGAGATTGCGAAGA | GATACATCGATCAGGCGAGTTAGGTCTCAGC               |
| UPH 5' WT genotyping     | CTCCTCTCCGGACAAGAATC                     | TGCTGCAAAATGAGTGTGG                           |
| UPH 5' KO genotyping     | CTCCTCTCCGGACAAGAATC                     | GGTTCCGGATCCACTAGTTCT                         |
| UPH 3' WT genotyping     | AGAGAACGCGGATGAGACCT                     | CCCTTGCAAAACAGAGAAAGG                         |
| UPH 3' KO genotyping     | GACCTGCAGCCCAAGCTA                       | CCCTTGCAAAACAGAGAAAGG                         |
| tdTO 5' WT genotyping    | CTCCTCTCCGGACAAGAATC                     | TGCTGCAAAATGAGTGTGG                           |
| tdTO 5' KO genotyping    | CTCCTCTCCGGACAAGAATC                     | ATGACCTCCTCGCCCTTG                            |
| tdTO 3' WT genotyping    | AGAGAACGCGGATGAGACCT                     | CCCTTGCAAAACAGAGAAAGG                         |
| tdTO 3' KO genotyping    | GACCTGCAGCCCAAGCTA                       | CCCTTGCAAAACAGAGAAAGG                         |
| Southern BamHI probe     | TGGTTTTCTTGTGCTTGCTG                     | CTGACTGGTCCCTTGAGCAT                          |
| Southern NdeI probe      | TCCTGGGAAGGCACTATGTC                     | ACCTTCTCCTGCCCCTTCATT                         |
| Hand1 ISH probe          | CCATCATCACCCTCACACC                      | GCGCCCTTAATCCTCTTCT                           |
| Nkx2-5 ISH probe         | TATGGCTACAACGCCTACCC                     | GTGTGGAAATCCGTCGAAAGT                         |
| ASO negative control     | AACACGTCTATACGC                          |                                               |
| ASO UPH A                | GCTAGTTAAGCAGGA                          |                                               |
| ASO UPH B                | ATTCAATTTAGGTCAT                         |                                               |
| 5GSP1                    |                                          | CAGCTGTATGGGCTCAGGTGACTGC                     |
| 3GSP1                    |                                          | TGGAGATGGGCTACCATTGGTGTGA                     |
| AP1                      | CCATCCCTAATACGACTCACTATAGGCC             |                                               |
| Hand2 - Gata site        | TTTACCCACTGGTCCCCTCT                     | TGGACAACATGGGACAGAAA                          |
| Nkx2-5 - Gata site       | CTGCAACTATCACC CGAAT                     | AGAAACCCCATCTGTTTCC                           |
| UPH ChIP site 1          | TCACCTCCCCATGTCTTTTC                     | GAGGAACCTGCATGTCTTTC                          |
| UPH ChIP site 2          | ACCTCGGGCTTTTCGATCTTA                    | GCTTGGGAAGGTAAGCCCTT                          |
| UPH ChIP site 3          | GAAACTAGCCTTGCCCTTC                      | GGGTGCTTAGGGAGGAATAC                          |
| Nkx2-5 ChIP - site 1     | ACTGTGAAGCCCAATTCAG                      | AACCAGAAATTTGTGGCAAGG                         |
