# Supplementary material
Source: PubMed Central journal article supplement (PMC5261552)

# SUPPLEMENTARY INFORMATION

doi:10.1038/nature20128

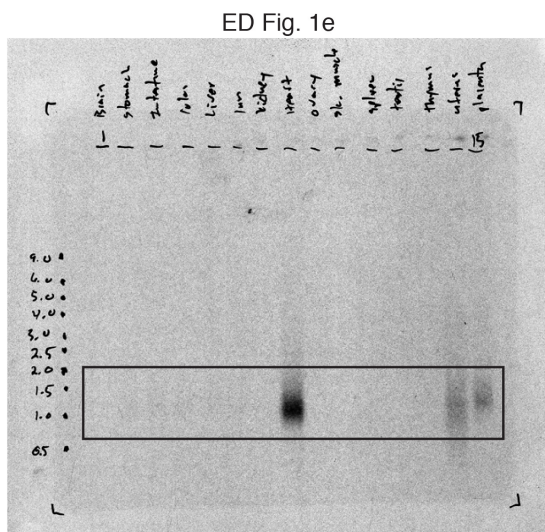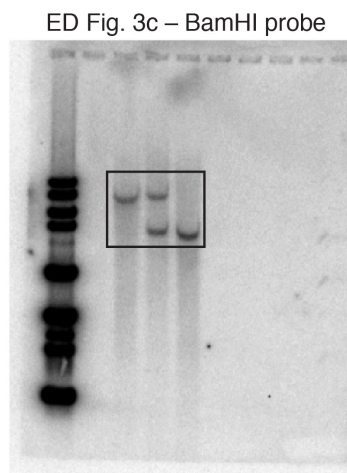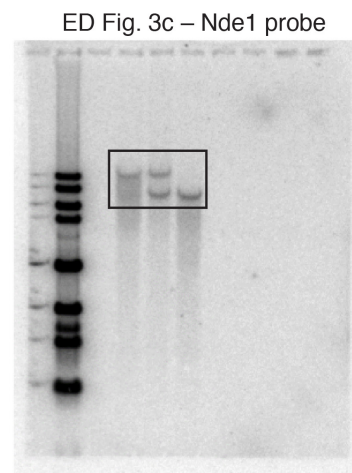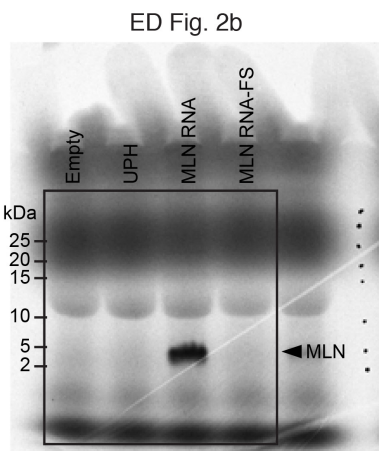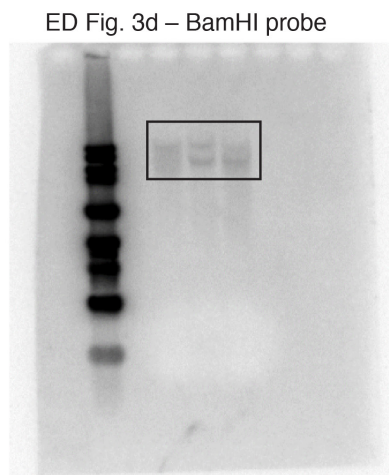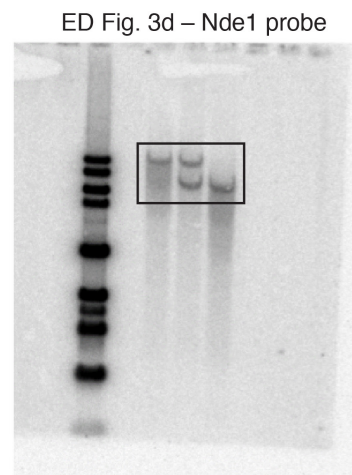

Supplement: NIHMS840520-supplement-supplemental.pdf [file NIHMS840520-supplement-supplemental.pdf]
